# Supplementary material for: Human shields mediate sexual conflict in a top predator
Source: PubMed Central journal article supplement (PMC4936045; doi:10.1098/rspb.2016.0906), 2016-06-29
Supplement: rspb20160906supp1.pdf [file rspb20160906supp1.pdf]

1 **Electronic Supplementary Material 1 – Supporting tables and figures**

2 ESM1 Table S1. Study-unit specific monitoring data of female brown bears with dependent  
3 offspring that we monitored in south-central Sweden between 2005 and 2012 to assess effects of  
4 habitat selection on litter fate (complete mortality/complete survival of the cubs in the litter). We  
5 excluded one female that experienced partial litter loss from the analyses. The start day of the  
6 study was 1 May (i.e., start of the mating season). ‘End day’ indicates the day of complete litter  
7 loss, or a randomly assigned date that followed the previously documented distribution of  
8 sexually selected infanticide events or attempts on the study area [1]. ‘Truncated’ implies  
9 whether or not we truncated the data of a specific individual to the last day of litter loss (16 June)  
10 observed in this study.  $N_{\text{relocations}}$  and GPS relocation fix rates were computed after conservative  
11 GPS data screening to retain only highly accurate GPS relocations. Fix rates between females  
12 that experienced litter survival (60.6%) and mortality (57.0%) were not statistically different  
13 (two Sample t-test,  $t = -0.571$ ,  $df = 20.444$ ,  $p = 0.575$ ). We removed one successful mother from  
14 the analysis (\*), because we started receiving GPS relocation data one day prior to the end of the  
15 truncated study period.

16

| <b>Bear ID</b> | <b>year</b> | <b>Start day</b> | <b>End day</b> | <b>Truncated</b> | <b>Nlocs</b> | <b>Fix rate</b> | <b>Fate</b> |
|----------------|-------------|------------------|----------------|------------------|--------------|-----------------|-------------|
| B7             | 2005        | 15 May           | 24 May         | no               | 142          | 0.336           | survival    |
| B1             | 2007        | 1 May            | 28 May         | no               | 554          | 0.437           | survival    |
| B10            | 2007        | 1 May            | 8 June         | no               | 980          | 0.549           | survival    |
| B4             | 2008        | 6 May            | 5 June         | no               | 765          | 0.531           | mortality   |
| B5             | 2008        | 6 May            | 5 June         | no               | 553          | 0.384           | mortality   |
| B19            | 2008        | 6 May            | 8 May          | no               | 84           | 0.875           | mortality   |
| B22            | 2008        | 6 May            | 27 May         | no               | 619          | 0.627           | survival    |
| B2             | 2009        | 1 May            | 15 June        | no               | 1499         | 0.694           | mortality   |
| B4             | 2009        | 1 May            | 8 May          | no               | 201          | 0.598           | mortality   |
| B11            | 2009        | 1 May            | 15 June        | no               | 500          | 0.744           | mortality   |
| B8             | 2009        | 1 May            | 6 June         | no               | 890          | 0.526           | survival    |
| B17            | 2009        | 1 May            | 30 June        | yes              | 1916         | 0.679           | survival    |
| B20            | 2009        | 1 May            | 14 June        | no               | 1256         | 0.607           | survival    |
| B21            | 2009        | 1 May            | 24 May         | no               | 906          | 0.838           | survival    |
| B13            | 2010        | 1 May            | 3 June         | no               | 924          | 0.583           | mortality   |
| B16            | 2010        | 1 May            | 16 May         | no               | 468          | 0.650           | mortality   |
| B9             | 2010        | 1 May            | 11 May         | no               | 410          | 0.872           | survival    |
| B14            | 2010        | 1 May            | 5 June         | no               | 1156         | 0.703           | survival    |
| B23 *          | 2010        | 14 June          | 19 June        | yes              | 134          | 0.570           | Survival    |
| B22            | 2011        | 1 May            | 6 June         | no               | 632          | 0.366           | mortality   |
| B3             | 2011        | 1 May            | 19 June        | yes              | 868          | 0.377           | survival    |
| B7             | 2011        | 1 May            | 24 June        | yes              | 1113         | 0.439           | survival    |
| B16            | 2011        | 1 May            | 6 June         | no               | 809          | 0.478           | survival    |
| B19            | 2011        | 1 May            | 10 May         | no               | 330          | 0.780           | survival    |
| B18            | 2012        | 1 May            | 29 May         | no               | 405          | 0.301           | mortality   |
| B20            | 2012        | 1 May            | 30 May         | no               | 757          | 0.544           | mortality   |
| B6             | 2012        | 1 May            | 22 June        | yes              | 1768         | 0.723           | survival    |
| B9             | 2012        | 1 May            | 21 May         | no               | 837          | 0.890           | survival    |
| B12            | 2012        | 1 May            | 14 June        | no               | 933          | 0.451           | survival    |
| B15            | 2012        | 21 May           | 4 June         | no               | 426          | 0.647           | survival    |

18 ESM1 Table S2. Candidate models for third-order resource selection functions of female brown  
19 bears during the mating season in south-central Sweden (2005-2012), ranked according to the  
20 second-order, bias-corrected Akaike Information Criterion difference ( $\Delta AIC_c$ ) and weight  
21 ( $AIC_{cw}$ ) values. '✓' indicates the inclusion of a landscape variable as a main term in a candidate  
22 model, '\*' indicates the inclusion of the interaction term 'litter survival' with a certain landscape  
23 variable. NDVI = Normalized Difference Vegetation Index.

24

25

26

| Model selection diagnostics |                |                   |  | Landscape variables     |             |                   |     |               |          |              |                 |            |  |
|-----------------------------|----------------|-------------------|--|-------------------------|-------------|-------------------|-----|---------------|----------|--------------|-----------------|------------|--|
| Rank                        | $\Delta AIC_c$ | AIC <sub>cw</sub> |  | Distance to the nearest |             | NDVI              | Bog | Tree-rich bog | Clearcut | Young forest | Mid-aged forest | Old forest |  |
|                             |                |                   |  | <i>forest road</i>      | <i>road</i> | <i>habitation</i> |     |               |          |              |                 |            |  |
| 1                           | -              | 1                 |  | ✓*                      | ✓*          | ✓*                | ✓*  | ✓*            | ✓*       | ✓*           | ✓*              | ✓*         |  |
| 2                           | 20.8           | 0                 |  | ✓                       | ✓*          | ✓*                | ✓   | ✓             | ✓*       | ✓*           | ✓*              | ✓*         |  |
| 3                           | 53.0           | 0                 |  | ✓*                      | ✓*          | ✓*                | ✓   | ✓             | ✓*       | ✓            | ✓               | ✓*         |  |
| 4                           | 202.7          | 0                 |  | ✓                       | ✓           | ✓*                | ✓   | ✓             | ✓        | ✓            | ✓               | ✓*         |  |
| 5                           | 1206.1         | 0                 |  | ✓                       | ✓           | ✓                 | ✓   | ✓             | ✓        | ✓            | ✓               | ✓          |  |
| 6                           | 2028.9         | 0                 |  | ✓*                      | ✓*          | ✓*                |     |               |          |              |                 |            |  |
| 7                           | 2036.7         | 0                 |  | ✓                       | ✓*          | ✓*                |     |               |          |              |                 |            |  |
| 8                           | 2065.0         | 0                 |  | ✓                       | ✓           | ✓*                |     |               |          |              |                 |            |  |
| 9                           | 2477.2         | 0                 |  |                         |             |                   | ✓*  | ✓*            | ✓*       | ✓*           | ✓*              | ✓*         |  |
| 10                          | 2479.1         | 0                 |  |                         |             |                   | ✓*  | ✓*            | ✓*       | ✓*           | ✓*              | ✓*         |  |
| 11                          | 2526.5         | 0                 |  |                         |             |                   | ✓*  | ✓*            | ✓*       | ✓*           | ✓*              | ✓*         |  |
| 12                          | 2562.6         | 0                 |  |                         |             |                   | ✓*  | ✓*            | ✓*       | ✓*           | ✓*              | ✓*         |  |
| 13                          | 2848.1         | 0                 |  |                         |             |                   | ✓   | ✓             | ✓        | ✓            | ✓               | ✓          |  |
| 14                          | 2921.4         | 0                 |  | ✓                       |             |                   |     |               |          |              |                 |            |  |
| 15                          | 4478.4         | 0                 |  |                         |             | ✓                 |     |               |          |              |                 | ✓          |  |

28 ESM1 Table S3. Most parsimonious candidate model to evaluate third-order resource selection  
 29 of female brown bears in relation to litter fate (survival/mortality) during the mating season in  
 30 south-central Sweden (2005-2012). NDVI = Normalized Difference Vegetation Index. ‘\*’  
 31 indicates statistically significant model terms (i.e., 0 not included in the 95% confidence  
 32 interval). Note that we reversed the sign of parameter estimates of the ‘distance to’ variables to  
 33 facilitate interpretation; positive values indicated ‘selection for’ whereas negative values  
 34 indicated ‘avoidance’.

| Model term                                     | $\beta$ | $\sigma$ | 95% confidence interval |             | * |
|------------------------------------------------|---------|----------|-------------------------|-------------|---|
|                                                |         |          | Lower level             | Upper level |   |
| Intercept                                      | -0.323  | 0.109    | -0.537                  | -0.109      | * |
| Survival vs. Mortality                         | 0.023   | 0.087    | -0.148                  | 0.194       |   |
| Distance to the nearest forest road            | -0.420  | 0.025    | 0.370                   | 0.470       | * |
| Distance to the nearest road                   | -0.557  | 0.031    | 0.496                   | 0.618       | * |
| Distance to the nearest habitation             | -0.210  | 0.022    | 0.167                   | 0.253       | * |
| Bog (1 vs 0)                                   | -0.761  | 0.091    | -0.939                  | -0.583      | * |
| Tree-rich bog (1 vs 0)                         | 0.452   | 0.135    | 0.187                   | 0.718       | * |
| Clearcut (1 vs 0)                              | -0.501  | 0.102    | -0.700                  | -0.302      | * |
| Young forest (1 vs 0)                          | 0.504   | 0.075    | 0.357                   | 0.650       | * |
| Mid-aged forest (1 vs 0)                       | 0.348   | 0.066    | 0.217                   | 0.478       | * |
| Old forest (1 vs 0)                            | 0.675   | 0.074    | 0.530                   | 0.819       | * |
| NDVI                                           | 0.188   | 0.020    | 0.150                   | 0.227       | * |
| Distance to the nearest forest road * Survival | 0.071   | 0.030    | -0.130                  | -0.013      | * |
| Distance to the nearest road * Survival        | 0.219   | 0.036    | -0.290                  | -0.149      | * |
| Distance to the nearest habitation * Survival  | 0.734   | 0.027    | -0.787                  | -0.681      | * |
| Bog * Survival                                 | -0.398  | 0.114    | -0.621                  | -0.174      | * |
| Tree-rich bog * Survival                       | -0.341  | 0.165    | -0.665                  | -0.017      | * |
| Clearcut * Survival                            | 1.061   | 0.117    | 0.831                   | 1.291       | * |
| Young forest * Survival                        | -0.067  | 0.091    | -0.245                  | 0.111       |   |
| Mid-aged forest * Survival                     | 0.210   | 0.081    | 0.051                   | 0.369       | * |
| Old forest * Survival                          | -0.485  | 0.090    | -0.662                  | -0.307      | * |
| NDVI * Survival                                | -0.006  | 0.024    | -0.053                  | 0.040       |   |

35

36

37 ESM1 Table S4: Descriptive statistics of continuous model terms included in the most  
 38 parsimonious model to assess habitat selection of successful (i.e., experiencing complete litter  
 39 survival) and unsuccessful (i.e., experiencing loss of the entire litter) female brown bears during  
 40 the mating season in south-central Sweden (2005-2012). Note that NVDI (Normalized  
 41 Difference Vegetation Index) is a unitless index, whereas the other covariates are expressed in  
 42 kilometers. Use and availability were sampled in a 1:1 ratio of GPS relocations and random  
 43 locations, respectively, and within annual individual-based 100% MCP home ranges.

|                                     |                     | Successful females   |               |                |                | 44 |
|-------------------------------------|---------------------|----------------------|---------------|----------------|----------------|----|
| <i>Covariate</i>                    |                     | <i>Mean</i>          | <i>Median</i> | <i>Minimum</i> | <i>Maximum</i> |    |
| Distance to the nearest forest road | <i>use</i>          | 0.660                | 0.525         | 0.000          | 3.060          |    |
|                                     | <i>availability</i> | 0.605                | 0.456         | 0.000          | 4.364          | 46 |
| Distance to the nearest road        | <i>use</i>          | 5.026                | 3.932         | 0.000          | 12.951         |    |
|                                     | <i>availability</i> | 4.581                | 3.966         | 0.000          | 14.812         |    |
| Distance to the nearest habitation  | <i>use</i>          | 0.979                | 0.783         | 0.025          | 3.083          |    |
|                                     | <i>availability</i> | 1.179                | 1.070         | 0.000          | 3.784          |    |
| NDVI                                | <i>use</i>          | 0.422                | 0.425         | -1.000         | 1.000          |    |
|                                     | <i>availability</i> | 0.392                | 0.402         | -1.000         | 1.000          |    |
|                                     |                     | Unsuccessful females |               |                |                |    |
| <i>Covariate</i>                    |                     | <i>Mean</i>          | <i>Median</i> | <i>Minimum</i> | <i>Maximum</i> |    |
| Distance to the nearest forest road | <i>use</i>          | 0.624                | 0.467         | 0.000          | 2.260          |    |
|                                     | <i>availability</i> | 0.487                | 0.460         | 0.000          | 2.525          |    |
| Distance to the nearest road        | <i>use</i>          | 5.880                | 5.274         | 0.000          | 15.080         |    |
|                                     | <i>availability</i> | 5.127                | 4.572         | 0.000          | 16.086         |    |
| Distance to the nearest habitation  | <i>use</i>          | 1.128                | 1.213         | 0.025          | 3.116          |    |
|                                     | <i>availability</i> | 1.090                | 1.035         | 0.000          | 3.559          |    |
| NDVI                                | <i>use</i>          | 0.431                | 0.430         | -1.000         | 1.000          |    |
|                                     | <i>availability</i> | 0.395                | 0.405         | -1.000         | 1.000          |    |

47 ESM1 Table S5: Proportion of use and availability of landscape variables included as dummies  
 48 in the most parsimonious model to assess habitat selection of successful (i.e., experiencing  
 49 complete litter survival) and unsuccessful (i.e., experiencing loss of entire litter) female brown  
 50 bears during the mating season in south-central Sweden (2005-2012). Use and availability were  
 51 sampled in a 1:1 ratio of GPS relocations and random locations, respectively, and within annual  
 52 individual-based 100% MCP home ranges.

| Land cover type | Successful mothers |                         | Unsuccessful mothers |                         | 53 |
|-----------------|--------------------|-------------------------|----------------------|-------------------------|----|
|                 | <i>Use (%)</i>     | <i>Availability (%)</i> | <i>Use (%)</i>       | <i>Availability (%)</i> |    |
| Bog             | 2.6                | 12.0                    | 4.6                  | 10.1                    |    |
| Tree-rich bog   | 1.6                | 3.1                     | 2.1                  | 2.4                     | 55 |
| Clearcut        | 9.8                | 8.3                     | 3.4                  | 8.9                     |    |
| Young forest    | 17.5               | 16.5                    | 18.3                 | 16.0                    | 56 |
| Mid-aged forest | 48.0               | 37.4                    | 43.6                 | 40.5                    |    |
| Old forest      | 14.6               | 16.5                    | 23.0                 | 15.2                    |    |

57

58

ESM1 Table S6: Comparison of resource availability within home ranges of successful (i.e., experiencing complete litter survival) and unsuccessful (i.e., experiencing loss of entire litter) female brown bears during the mating season in south-central Sweden (2005-2012). We tested if resource availability differed between successful and unsuccessful mother with mixed effect regression models with the landscape covariate as response variable. We fitted linear models for the continuous landscape covariates and logistic models for the binomial land cover classes as response variables and ‘survival’ (1 vs 0) as the only fixed effect. We included ‘bear identity’ and ‘year’ as random factors on the intercept. ‘\*’ indicates statistically significant model terms (i.e., 0 not included in the 95% confidence interval).

| Landscape covariate                 | $\beta$ | $\sigma$ | 95% confidence interval |                    |   |
|-------------------------------------|---------|----------|-------------------------|--------------------|---|
|                                     |         |          | <i>Lower level</i>      | <i>Upper level</i> |   |
| Distance to the nearest forest road | -0.031  | 0.043    | -0.115                  | 0.053              |   |
| Distance to the nearest road        | -0.322  | 0.041    | -0.402                  | -0.242             | * |
| Distance to the nearest habitation  | -0.085  | 0.051    | -0.185                  | 0.015              |   |
| Bog (1 vs 0)                        | -0.173  | 0.088    | -0.345                  | -0.001             | * |
| Tree-rich bog (1 vs 0)              | 0.089   | 0.157    | -0.219                  | 0.397              |   |
| Clearcut (1 vs 0)                   | 0.266   | 0.096    | 0.078                   | 0.454              | * |
| Young forest (1 vs 0)               | -0.146  | 0.083    | -0.309                  | 0.017              |   |
| Mid-aged forest (1 vs 0)            | 0.037   | 0.064    | -0.089                  | 0.162              |   |
| Old forest (1 vs 0)                 | 0.026   | 0.075    | -0.121                  | 0.173              |   |
| NDVI                                | 0.004   | 0.032    | -0.059                  | 0.067              |   |

68  
69  
70  
71  
72  
73  
74  
75  
76



77 ESM1 Figure S1. Length and intensity of the mating season (gray) of brown bears in south-  
78 central Sweden, based on the density distribution of interactions (i.e., co-occurrence within 30 m)  
79 between GPS-collared adult males and females. We recorded 96 unique male-female pairs,  
80 yielding 6,475 interactions between 2007 and 2011. The density distribution of sexually selected  
81 infanticide (N = 20), infanticide attempts (N = 2), and cub loss due to reasons unknown (N = 2)  
82 (red) matches well with the mating season of the study population. Figure reproduced from  
83 Steyaert [1].

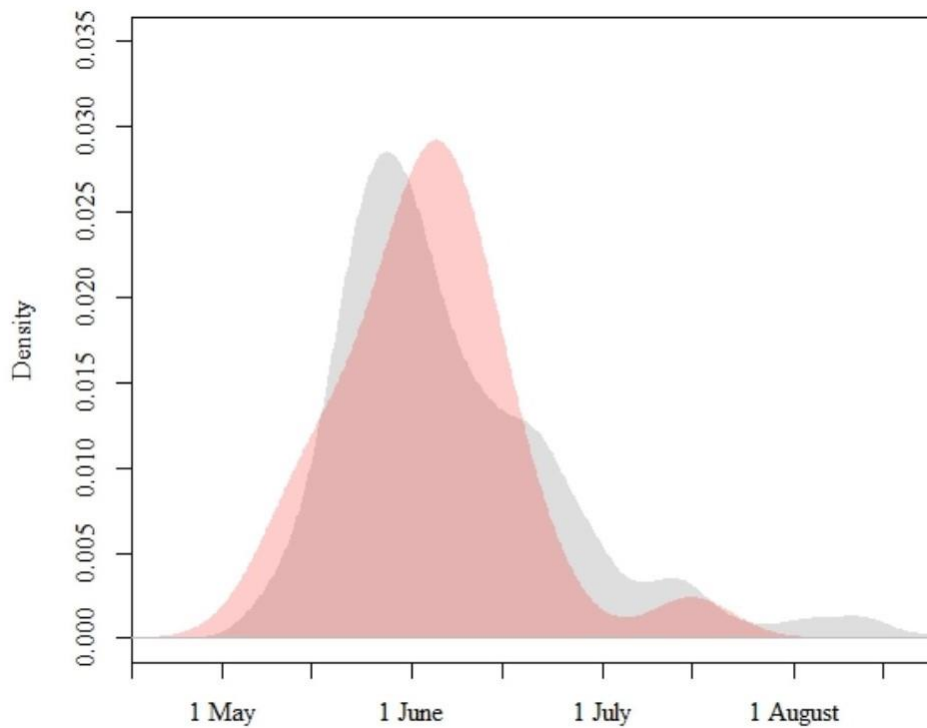

84  
85  
86  
87  
88  
89  
90

91 ESM1 Figure S2. Plotting normalized difference vegetation index (NDVI) values (as a proxy for  
92 vegetation density which may ) against distance to the nearest habitation (km) of all random  
93 locations used in this study revealed no strong relationship between the two covariates (Pearson  
94 correlation coefficient  $r = -0.07$ ).

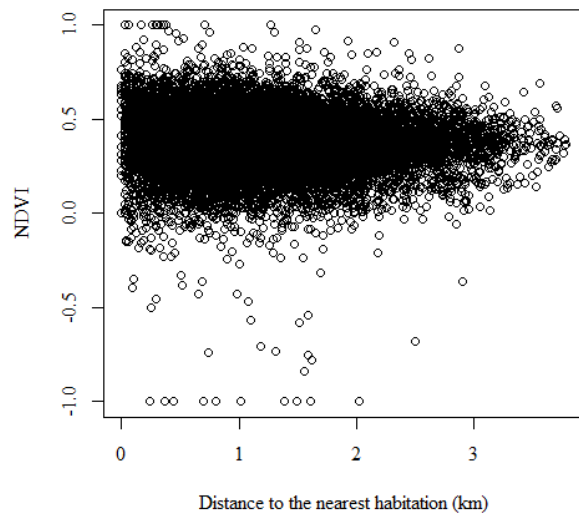

95

96

## 97 **References**

98 [1] Steyaert, S.M.J.G. 2012 *The mating system of the brown bear in relation to the sexually*  
99 *selected infanticide theory*. Aas, Norway, PhD thesis, Norwegian University of Life Sciences.

100
