# Supplementary material for: Human shields mediate sexual conflict in a top predator
Source: PubMed Central journal article supplement (PMC4936045; doi:10.1098/rspb.2016.0906), 2016-06-29
Supplement: rspb20160906supp2.pdf [file rspb20160906supp2.pdf]

1 **Electronic Supplementary Material 2: Spatial landscape data – motivation and predictions**

2 We considered three groups of spatial landscape variables in our analyses; i.e., land cover data,  
3 distance to human footprint variables, and the Normalized Difference Vegetation Index. We  
4 chose not to include other potentially relevant covariates for animal habitat selection in the  
5 candidate models (e.g. topography, distance to habitat edges, patch sizes, etc.), because our main  
6 focus was on the land cover data and the human footprint-related variables and because we  
7 wanted to avoid overfitting the models [1].

8 Land cover

9 *Bog and tree-rich bog* – Bogs and tree-rich bogs are among the least productive habitat types in  
10 the boreal forest in terms of living conditions or foods for many species, including large  
11 mammals [2, 3]. Several studies have suggested that female brown bears with dependent  
12 offspring avoid high-quality habitat in terms of foraging and energy gain (e.g., prime salmon  
13 spawning streams) [4-7], and that trait-mediated effects of infanticide can have a nutritive cost [8,  
14 9]. Because bogs and tree-rich bogs have little to offer in terms of food for solitary adult females  
15 and the adult males that associate with them during the mating season [10, 11], we expected that  
16 bogs and tree-rich bogs would provide relatively safe habitat for mothers with a dependent litter.  
17 Consequently, we expected that successful mothers (i.e. no litter loss during the mating season)  
18 would have selected for bogs and tree rich-bogs and that unsuccessful females would have  
19 avoided these land cover types.

20 *Clearcuts* –We expected that successful mothers would have shown strong positive selection for  
21 clearcuts, whereas we expected strong avoidance of clearcuts by unsuccessful mothers. Three  
22 complementary mechanism form the basis for this prediction. First, besides carpenter ants

23 (*Camponotus herculeanus*) [12] and some early herbs, grasses, and sedges, recent clearcuts (< 10  
24 years old) have little to offer in terms of food resources for bears during the mating season.  
25 Second, previous research in our study area indicated that solitary females and adult males select  
26 for densely vegetated habitat patches that provide much cover, presumably to avoid being  
27 detected by humans [13, 14]. Females with dependent offspring, however, appeared to select for  
28 less dense vegetation, presumably to avoid infanticidal males [11]. Third, recent clearcuts may  
29 reflect a stronger human footprint than older forests types, bogs, and tree-rich bogs [15], and  
30 adult males and solitary adult females seem to be most sensitive towards human footprint-related  
31 landscape features [11, 16, 17]. In summary, we expect that clearcuts would be strongly avoided  
32 by solitary females and the males that associate with them during the mating season, because  
33 clearcuts are poor habitat in terms of food resources and cover, and have a strong human  
34 footprint. Consequently, clearcuts can provide relatively safe habitat for successful mothers, and  
35 mothers that had avoided clearcuts were expected to have higher odds of losing their litter due to  
36 SSI.

37 *Young forest* – Young forest types are typically dense and provide much cover. Previous research  
38 in our study area showed that young forest is a highly selected resource for solitary females and  
39 adult males during daytime throughout the year, presumably to minimize the risk of disturbance  
40 by humans [11, 13, 14, 18]. Because we expect that avoiding conspecifics to reduce the risk for  
41 SSI can pay off in terms of offspring survival, we expected that successful mothers would have  
42 more strongly avoided young forest than unsuccessful mothers.

43 *Mid-aged and old forest* – Brown bear cubs often climb trees when sudden risk appears, for  
44 example when approached by humans or conspecifics [11, 19]. The availability of large trees  
45 may thus be a critical resource to facilitate escape from SSI for mothers and their litters. Such

46 trees are more common in more mature forest stands. Therefore, we expected that successful  
47 mothers would have more strongly selected for mid-aged and especially old forest types  
48 compared to unsuccessful mothers.

#### 49 Human footprints

50 As outlined in the main body of our article, we expect that successful mothers associate with  
51 humans to reduce the risk for SSI. We considered roads, forest roads, and human habitation  
52 (buildings, settlements, villages) as landscape features with a strong human footprint. We  
53 distinguished between these three landscape features, because of their varying predictability of  
54 human activity, since predictability of a risk or disturbance can be an important cue for animals  
55 to adjust their behavior and space use [20-22]. We assumed that human activity is relatively  
56 constant and predictable around habitation, less constant but relatively predictable around paved  
57 roads with regular motorized traffic, and relatively low and unpredictable on unpaved forest  
58 roads. Consequently, we expected that successful mothers would have selected for areas close to,  
59 in order of relevance, human habitation, roads, and forest roads. We expected that unsuccessful  
60 mothers would generally have avoided these land cover types.

#### 61 NDVI

62 The spectral normalized difference vegetation index (NDVI) is a proxy for vegetation density  
63 and thus cover [23]. Several wildlife ecological studies have now shown the relevance of NDVI  
64 for animal behavior [24, 25], including brown bears [26, 27]. Our previous research indicated  
65 that solitary females and adult males strongly select for patches with high NDVI values,  
66 especially during daytime [11]. Selection for patches with high NDVI values by successful  
67 mothers was stable throughout the day, and lower compared to conspecifics. We previously

68 explained this behavioral difference as a spatiotemporal anti-SSI strategy. Here, we expected that  
69 unsuccessful mothers had selected for patches with higher NDVI values than successful mothers.

## 70 **References**

71 [1] Zuur, A.F., Ieno, E.N., Walker, N.J., Saveliev, A.A. & Smith, G.M. 2009 *Mixed effects*  
72 *models and extensions in ecology with R*. New York, Springer; 573 p.

73 [2] Bjørneraas, K., Solberg, E.J., Herfindal, I., Moorter, B.V., Rolandsen, C.M., Tremblay, J.-P.,  
74 Skarpe, C., Sæther, B.-E., Eriksen, R. & Astrup, R. 2011 Moose Alces alces habitat use at  
75 multiple temporal scales in a human-altered landscape. *Wildlife Biology* **17**, 44-54.  
76 (doi:10.2981/10-073).

77 [3] Moen, A. 1999 *National Atlas of Norway: Vegetation*. Hønefoss, Norway 200 p.

78 [4] Rode, K.D., Farley, S.D. & Robbins, C.T. 2006 Sexual dimorphism, reproductive strategy  
79 and human activities determine resource use by brown bears. *Ecology* **87**, 2636-2646.  
80 (doi:doi:10.1890/0012-9658(2006)87[2636:SDRSAH]2.0.CO;2).

81 [5] Craighead, J.J., Sumner, J.S. & Mitchell, J.A. 1995 *The grizzly bears of Yellowstone: their*  
82 *ecology in the Yellowstone Ecosystem, 1959 - 1992*. Washington D.C., Island Press.

83 [6] Pearson, M.A. 1975 *The northern interior grizzly bear Ursus arctos L*. Ottawa, Canada,  
84 Canadian Wildlife Service.

85 [7] Swenson, J.E., Dahle, B. & Sandegren, F. 2001 Intraspecific predation in Scandinavian  
86 brown bears older than cubs-of-the-year. *Ursus* **12**, 81-91.

87 [8] Steyaert, S.M.J.G., Reusch, C., Brunberg, S., Swenson, J.E., Hackländer, K. & Zedrosser, A.  
88 2013 Infanticide as a male reproductive strategy has a nutritive risk effect in brown bears.  
89 *Biology Letters*, 20130624. (doi:doi:10.5061/dryad.h359g).

- 90 [9] Ben-David, M., Titus, K. & Beier, L. 2004 Consumption of salmon by Alaskan brown bears:  
91 a trade-off between nutritional requirements and the risk of infanticide? *Oecologia* **138**, 465-474.  
92 (doi:10.1007/s00442-003-1442-x).
- 93 [10] Steyaert, S.M.J.G., Endrestøl, A., Hackländer, K., Swenson, J.E. & Zedrosser, A. 2012 The  
94 mating system of the brown bear *Ursus arctos*. *Mammal Review* **42**, 12-34. (doi:10.1111/j.1365-  
95 2907.2011.00184.x).
- 96 [11] Steyaert, S.M.J.G., Kindberg, J., Swenson, J.E. & Zedrosser, A. 2013 Male reproductive  
97 strategy explains spatiotemporal segregation in brown bears. *Journal of Animal Ecology* **82**, 836-  
98 845. (doi:10.1111/1365-2656.12055).
- 99 [12] Frank, S.C., Steyaert, S.M.J.G., Swenson, J.E., Storch, I., Kindberg, J., Barck, H. &  
100 Zedrosser, A. 2015 A “clearcut” case? Brown bear selection of coarse woody debris and  
101 carpenter ants on clearcuts. *Forest Ecology and Management* **348**, 164-173.  
102 (doi:<http://dx.doi.org/10.1016/j.foreco.2015.03.051>).
- 103 [13] Martin, J., Basille, M., Van Moorter, B., Kindberg, J., Allainé, D. & Swenson, J.E. 2010  
104 Coping with human disturbance: spatial and temporal tactics of the brown bear (*Ursus arctos*).  
105 *Canadian Journal of Zoology* **88**, 875-883. (doi:doi:10.1139/Z10-053).
- 106 [14] Ordiz, A., Støen, O.-G., Delibes, M. & Swenson, J. 2011 Predators or prey? Spatio-temporal  
107 discrimination of human-derived risk by brown bears. *Oecologia* **166**, 59-67.  
108 (doi:10.1007/s00442-011-1920-5).
- 109 [15] Leclerc, M., Dussault, C. & St-Laurent, M.-H. 2014 Behavioural strategies towards human  
110 disturbances explain individual performance in woodland caribou. *Oecologia* **176**, 297-306.  
111 (doi:10.1007/s00442-014-3012-9).

- 112 [16] Nellemann, C., Støen, O.-G., Kindberg, J., Swenson, J.E., Vistnes, I., Ericsson, G.,  
113 Katajisto, J., Kaltenborn, B.P., Martin, J. & Ordiz, A. 2007 Terrain use by an expanding brown  
114 bear population in relation to age, recreational resorts and human settlements. *Biological*  
115 *Conservation* **138**, 157-165. (doi:DOI: 10.1016/j.biocon.2007.04.011).
- 116 [17] Elfström, M. & Swenson, J.E. 2009 Effects of sex and age on den site use by Scandinavian  
117 brown bears. *Ursus* **20**, 85-93. (doi:10.2192/09gr005.1).
- 118 [18] Moen, G.K., Støen, O.-G., Sahlén, V. & Swenson, J.E. 2012 Behaviour of solitary adult  
119 Scandinavian brown bears (*Ursus arctos*) when approached by humans on Foot. *PLoS ONE* **7**,  
120 e31699. (doi:10.1371/journal.pone.0031699).
- 121 [19] Swenson, J.E. 2003 Implications of sexually selected infanticide for the hunting of large  
122 carnivores. In *Animal behavior and wildlife conservation* (eds. M. Festa-Bianchet & M.  
123 Apollonio), pp. 171-189. Washington DC, Island press.
- 124 [20] Lima, S.L. & Bednekoff, P.A. 1998 Temporal variation in danger drives antipredator  
125 behavior: The predation risk allocation hypothesis. *The American Naturalist* **153**, 649-659.
- 126 [21] Houston, A.I., Higginson, A.D. & McNamara, J.M. 2011 Optimal foraging for multiple  
127 nutrients in an unpredictable environment. *Ecology Letters* **14**, 1101-1107. (doi:10.1111/j.1461-  
128 0248.2011.01678.x).
- 129 [22] Houston, A.I., McNamara, J.M. & Hutchinson, J.M.C. 1993 General results concerning the  
130 trade-off between gaining energy and avoiding predation. *Philosophical Transactions of the*  
131 *Royal Society of London. Series B: Biological Sciences* **341**, 375-397.  
132 (doi:10.1098/rstb.1993.0123).

133 [23] Pettorelli, N., Vik, J.O., Mysterud, A., Gaillard, J.M., Tucker, C.J. & Stenseth, N.C. 2005  
134 Using the satellite-derived NDVI to assess ecological responses to environmental change. *Trends*  
135 *in Ecology and Evolution* **20**, 503-510.

136 [24] Lone, K. 2015 Lidar, habitat structure and the ecology of ungulates in a landscape of fear.  
137 Ås, Norway, Norwegian University of Life Sciences.

138 [25] Rivrud, I.M., Bischof, R., Meisingset, E.L., Zimmermann, B., Loe, L.E. & Mysterud, A.  
139 2016 Leave before it's too late: Anthropogenic and environmental triggers of autumn migration  
140 in a hunted ungulate population. *Ecology*, n/a-n/a. (doi:10.1890/15-1191).

141 [26] Steyaert, S.M.J.G., Støen, O.-G., Elfström, M., Karlsson, J., Lammeren, R.V., Bokdam, J.,  
142 Zedrosser, A., Brunberg, S. & Swenson, J.E. 2012 Resource selection by sympatric free-ranging  
143 dairy cattle and brown bears *Ursus arctos*. *Wildlife Biology* **17**, 389-403. (doi:10.2981/11-004).

144 [27] Bojarska, K. & Selva, N. 2012 Spatial patterns in brown bear *Ursus arctos* diet: the role of  
145 geographical and environmental factors. *Mammal Review* **42**, 120-143. (doi:10.1111/j.1365-  
146 2907.2011.00192.x).

147
