# Supplementary material for: Human shields mediate sexual conflict in a top predator
Source: PubMed Central journal article supplement (PMC4936045; doi:10.1098/rspb.2016.0906), 2016-06-29
Supplement: rspb20160906supp3.pdf [file rspb20160906supp3.pdf]

### 1 **Electronic Supplementary Material 3 – Second-order habitat selection**

2

3 Habitat selection has a hierarchical nature [1, 2], from the geographical range of a species at the  
4 largest scale (first-order selection), spatial and temporal dynamics of home ranges (third-order  
5 selection), habitat selection within the home range (second-order selection), to micro-habitat  
6 selection at the smallest spatial scale (e.g., selection of food items at a foraging site, fourth-order  
7 selection) [1]. Our main focus was third-order habitat selection; i.e. to investigate how mothers  
8 select resources once the home ranges have established, and how that selection affected litter  
9 fate. However, our analyses did not provide insight in second-order habitat selection; or how the  
10 location of the home range within the landscape influenced litter survival. Consequently, and  
11 complimentary to the main article, we evaluated the relationship between second-order habitat  
12 selection and litter survival in female brown bears. We hypothesized ESM3 H1) that second-  
13 order habitat selection is an important determining factor for litter fate, and ESM3 H2) that  
14 successful mothers (i.e. experiencing litter survival during the mating season) benefit from  
15 selecting for areas near human footprint, whereas unsuccessful mothers avoid such areas.

16 *Methods* – We used the same modeling approach as outlines in the main document, with the  
17 exception that we now sampled resource availability over the entire study area; i.e. a spatial  
18 merge of the 100% minimum convex polygon home ranges of all mothers included in this study.

19 *Results* – The full model, including the interaction ‘litter survival’ on all landscape covariates  
20 was the most parsimonious model ( $\Delta AIC_c = 0$ ,  $AIC_{cw} = 1$ ) to assess the relationship between  
21 second-order habitat selection and litter survival. All other candidate models were inconclusive  
22 (all  $\Delta AIC_c$  values  $\geq 56.3$ ) (ESM3 Table 1).

23 Unsuccessful mothers (i.e., the main effects of the landscape variables in the most parsimonious  
24 model) avoided human habitation ( $-0.116 \pm 0.020$ ), roads ( $-0.375 \pm 0.011$ ), bogs ( $-0.652 \pm$   
25  $0.086$ ), and clearcuts ( $-0.478 \pm 0.101$ ). They selected for tree rich bogs ( $0.338 \pm 0.124$ ), young  
26 forest ( $0.453 \pm 0.072$ ), mid-aged forest ( $0.362 \pm 0.065$ ), old forest ( $0.638 \pm 0.072$ ), and patches  
27 with high NDVI values ( $0.184 \pm 0.019$ ). Habitat selection of unsuccessful mothers was not  
28 affected by forest roads ( $0.009 \pm 0.021$ ) (ESM3 Table 2, ESM3 Figure S1).

29 The interaction term ‘survival’ was influential on, in order of relative importance, distance to the  
30 nearest human habitation ( $0.540 \pm 0.025$ ,  $\Delta\text{AIC}_{\text{diff}} = -485.4$ ) and forest road ( $-0.308 \pm 0.025$ ,  
31  $\Delta\text{AIC}_{\text{diff}} = -146.7$ ), clearcuts ( $1.144 \pm 0.116$ ,  $\Delta\text{AIC}_{\text{diff}} = -97.6$ ), distance to the nearest road  
32 ( $0.150 \pm 0.024$ ,  $\Delta\text{AIC}_{\text{diff}} = -36.1$ ), bog ( $-0.490 \pm 0.110$ ,  $\Delta\text{AIC}_{\text{diff}} = -17.7$ ), old ( $-0.291 \pm 0.088$ ,  
33  $\Delta\text{AIC}_{\text{diff}} = -8.89$ ), and mid-aged forest ( $0.233 \pm 0.079$ ,  $\Delta\text{AIC}_{\text{diff}} = -6.65$ ) (ESM3 Table 2, ESM3  
34 Figure 1 and 2). Young forest ( $0.130 \pm 0.089$ ,  $\Delta\text{AIC}_{\text{diff}} = -0.15$ ), tree-rich bogs ( $-0.214 \pm 0.155$ ,  
35  $\Delta\text{AIC}_{\text{diff}} = -0.10$ ), and NDVI ( $-0.028 \pm 0.024$ ,  $\Delta\text{AIC}_{\text{diff}} = -0.55$ ) did not affect litter survival  
36 (ESM3 Table S2, ESM3 Figure S1 and S2). Note that we reversed the sign of the estimates for  
37 the ‘distance to’ variables to facilitate interpretation; i.e. negative values imply avoidance,  
38 positive values indicate positive selection.

39 *Conclusions* – The results indicate that habitat selection on the landscape scale is also an  
40 important component of litter survival (ESM3 H1), and that successful mothers selected for areas  
41 close to human habitation whereas unsuccessful mothers avoided human habitation (ESM3 H2).  
42 In general, patterns in second and third-order resource selection appeared to be very similar, for  
43 both successful and unsuccessful mothers. One important question, however, remains  
44 unanswered; i.e. what is the underlying mechanisms for the selection for areas close to human  
45 habitation on the landscape scale? Two complimentary mechanism may explain this. Firstly,

46 successful mothers with a litter may actively shift their home range to areas of high human  
47 footprint, whereas unsuccessful mothers show higher site fidelity. Annual home range drift and  
48 low levels of site fidelity have been documented in several large mammals [3], including brown  
49 bears[4]. Such shifts are typically explained by variation in food availability [4]. However, other  
50 ecological conditions could explain such patterns as well (e.g. human disturbance) [5], including  
51 infanticide risk. Secondly, dispersal in brown bears is male biased and female brown bears form  
52 matrilineal assemblages [6]. Older, more experienced and dominant mothers may express more  
53 site fidelity than younger ones, and force younger and less dominant females to less favorable  
54 areas (e.g. close to human disturbance). Such mechanism would indicate a mismatch between  
55 recent rapid human population growth and encroachment in wildlife habitat and the evolution of  
56 reproductive strategies. Both mechanisms warrant further research on this topic.

57

58 ESM3 Table S1. Candidate models for second-order resource selection functions of female  
59 brown bears during the mating season in south-central Sweden (2005-2012), ranked according to  
60 the second-order bias corrected Akaike Information Criterion difference ( $\Delta AIC_c$ ) and weight  
61 ( $AIC_{cw}$ ) values. '✓' indicates the inclusion of a landscape variable as a main term in a candidate  
62 model, '\*' indicates the inclusion of the interaction term 'litter survival' with a certain landscape  
63 variable. NDVI = Normalized Difference Vegetation Index.

64  
65  
66  
67  
68  
69  
70  
71  
72  
73  
74  
75  
76  
77  
78  
79  
80  
81  
82  
83  
84

| Model selection diagnostics |                |                   |                         | Landscape variables |      |            |      |     |               |          |              |                 |            |
|-----------------------------|----------------|-------------------|-------------------------|---------------------|------|------------|------|-----|---------------|----------|--------------|-----------------|------------|
| Rank                        | $\Delta AIC_c$ | AIC <sub>cw</sub> | Distance to the nearest | road                |      | habitation | NDVI | Bog | Tree rich bog | Clearcut | Young forest | Mid-aged forest | Old forest |
|                             |                |                   |                         | forest              | road |            |      |     |               |          |              |                 |            |
| 1                           | 0.0            | 1                 | ✓ *                     | ✓ *                 | ✓ *  | ✓ *        | ✓ *  | ✓ * | ✓ *           | ✓ *      | ✓ *          | ✓ *             | ✓ *        |
| 3                           | 56.3           | 0                 | ✓ *                     | ✓ *                 | ✓ *  | ✓ *        | ✓    | ✓   | ✓ *           | ✓        | ✓            | ✓               | ✓ *        |
| 2                           | 157.0          | 0                 | ✓                       | ✓ *                 | ✓ *  | ✓ *        | ✓    | ✓   | ✓ *           | ✓ *      | ✓ *          | ✓ *             | ✓ *        |
| 4                           | 316.6          | 0                 | ✓                       | ✓                   | ✓ *  | ✓ *        | ✓    | ✓   | ✓             | ✓        | ✓            | ✓               | ✓ *        |
| 5                           | 844.9          | 0                 | ✓                       | ✓                   | ✓    | ✓          | ✓    | ✓   | ✓             | ✓        | ✓            | ✓               | ✓          |
| 7                           | 1595.7         | 0                 | ✓                       | ✓ *                 | ✓ *  | ✓ *        |      |     |               |          |              |                 |            |
| 6                           | 1597.5         | 0                 | ✓ *                     | ✓ *                 | ✓ *  | ✓ *        |      |     |               |          |              |                 |            |
| 8                           | 1621.7         | 0                 | ✓                       | ✓                   | ✓    | ✓          |      |     |               |          |              |                 |            |
| 9                           | 1639.0         | 0                 |                         |                     |      | ✓          | ✓ *  | ✓ * | ✓ *           | ✓ *      | ✓ *          | ✓ *             | ✓ *        |
| 10                          | 1836.5         | 0                 |                         |                     |      | ✓          | ✓ *  | ✓ * | ✓ *           | ✓ *      | ✓ *          | ✓ *             | ✓ *        |
| 11                          | 1999.5         | 0                 |                         |                     |      | ✓          | ✓    | ✓   | ✓ *           | ✓ *      | ✓ *          | ✓ *             | ✓ *        |
| 12                          | 2129.8         | 0                 |                         |                     |      | ✓          | ✓    | ✓   | ✓ *           | ✓ *      | ✓ *          | ✓ *             | ✓ *        |
| 13                          | 2167.6         | 0                 |                         |                     |      | ✓          | ✓    | ✓   | ✓ *           | ✓ *      | ✓ *          | ✓ *             | ✓ *        |
| 14                          | 2602.9         | 0                 | ✓                       | ✓                   | ✓    | ✓          | ✓    | ✓   | ✓             | ✓        | ✓            | ✓               | ✓          |
| 15                          | 3534.0         | 0                 |                         |                     |      |            |      |     |               |          |              |                 |            |

88 ESM3 Table S2. Most parsimonious candidate model to evaluate second-order resource selection  
89 of female brown bears in relation to litter fate (survival/mortality) during the mating season in  
90 south-central Sweden (2005-2012). NDVI = Normalized Difference Vegetation Index. ‘\*’  
91 indicates statistically significant model terms (i.e., 0 not included in the 95% confidence  
92 interval). Note that we reversed the sign of parameter estimates of the ‘distance to’ variables to  
93 facilitate interpretation; positive values indicated ‘selection for’ whereas negative values  
94 indicated ‘avoidance’.

| Model term                                     | $\beta$ | $\sigma$ | 95% confidence interval |             |   |
|------------------------------------------------|---------|----------|-------------------------|-------------|---|
|                                                |         |          | Lower level             | Upper level |   |
| Intercept                                      | -0.356  | 0.075    | -0.504                  | -0.208      | * |
| Survival vs. Mortality                         | -0.041  | 0.080    | -0.198                  | 0.115       |   |
| Distance to the nearest forest road            | -0.009  | 0.021    | -0.032                  | 0.050       |   |
| Distance to the nearest road                   | -0.375  | 0.020    | 0.336                   | 0.414       | * |
| Distance to the nearest habitation             | -0.116  | 0.020    | 0.077                   | 0.155       | * |
| Bog (1 vs 0)                                   | -0.652  | 0.086    | -0.821                  | -0.483      | * |
| Tree rich bog (1 vs 0)                         | 0.338   | 0.124    | 0.095                   | 0.582       | * |
| Clearcut (1 vs 0)                              | -0.478  | 0.101    | -0.675                  | -0.280      | * |
| Young forest (1 vs 0)                          | 0.453   | 0.072    | 0.311                   | 0.595       | * |
| Mid-aged forest (1 vs 0)                       | 0.362   | 0.065    | 0.235                   | 0.489       | * |
| Old forest (1 vs 0)                            | 0.638   | 0.072    | 0.497                   | 0.779       | * |
| NDVI                                           | 0.184   | 0.019    | 0.146                   | 0.222       | * |
| Distance to the nearest forest road * Survival | -0.308  | 0.025    | 0.258                   | 0.358       | * |
| Distance to the nearest road * Survival        | 0.150   | 0.024    | -0.198                  | -0.102      | * |
| Distance to the nearest habitation * Survival  | 0.540   | 0.025    | -0.588                  | -0.492      | * |
| Bog * Survival                                 | -0.490  | 0.110    | -0.706                  | -0.274      | * |
| Tree rich bog * Survival                       | -0.214  | 0.155    | -0.518                  | 0.090       |   |
| Clearcut * Survival                            | 1.144   | 0.116    | 0.917                   | 1.372       | * |
| Young forest * Survival                        | 0.130   | 0.089    | -0.044                  | 0.304       |   |
| Mid-aged forest * Survival                     | 0.233   | 0.079    | 0.078                   | 0.388       | * |
| Old forest * Survival                          | -0.291  | 0.088    | -0.465                  | -0.118      | * |
| NDVI * Survival                                | -0.028  | 0.024    | -0.075                  | 0.018       |   |

95

96

97

98 ESM3 Figure S1. Parameter estimates and confidence intervals ( $\beta \pm 1.96 \cdot se$ ) of model variables  
99 included in the most parsimonious model to evaluate resource selection of female brown bears  
100 that experienced litter survival (black) and complete litter loss (grey) during the mating season in  
101 south-central Sweden (2005-2012). Positive values indicate selection, negative values indicate  
102 avoidance. We reversed the sign of the distance to the nearest ‘road’, ‘forest road’, and  
103 ‘habitation’ to facilitate interpretation. NDVI = Normalized Difference Vegetation Index, TRB =  
104 tree rich bog, Old = old forest, Mid aged = mid-aged forest, Young = young forest. We scaled all  
105 continuous variables around mean = 0 and variance = 1 to facilitate comparison.

106

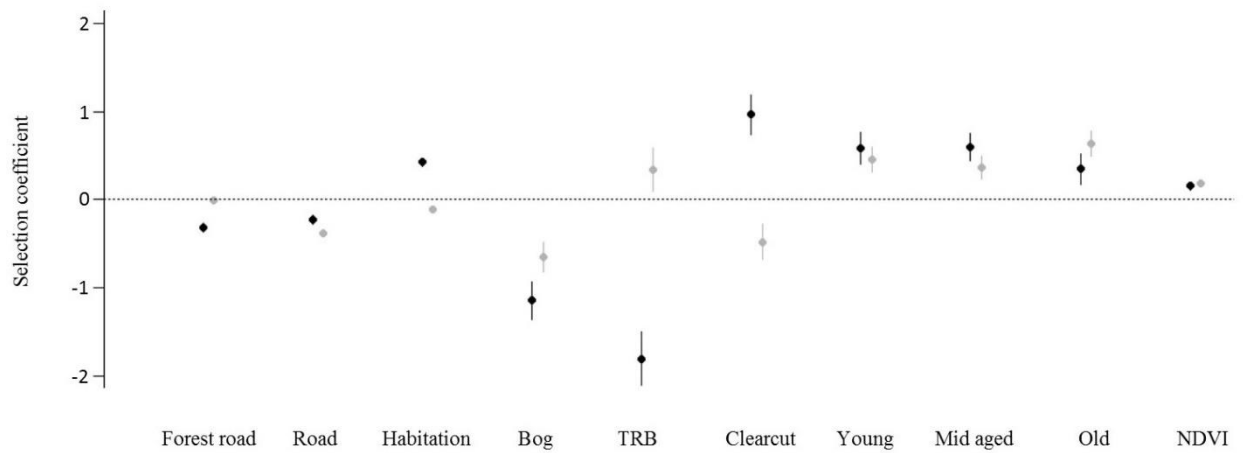

107

108

109 ESM3 Fig S2. Relative importance ( $\Delta AIC_{diff}$ ) of the interaction term ‘litter survival’ on the  
110 landscape variables in the most parsimonious model to assess second order resource selection of  
111 female brown bears that experience litter survival (N = 18) and complete loss (N = 11) during the  
112 mating season in south-central Sweden (2005-2012).  $\Delta AIC_{diff} > 4$  (horizontal red line) supports  
113 the inclusion of the interaction term ‘litter survival’ on landscape variables. We reversed the sign  
114 of the  $\Delta AIC_{diff}$  values to facilitate interpretation: high values indicate high importance. TRI =  
115 terrain ruggedness at the local scale, TRI1000 = terrain ruggedness at the landscape scale, Old =  
116 old forest.

117

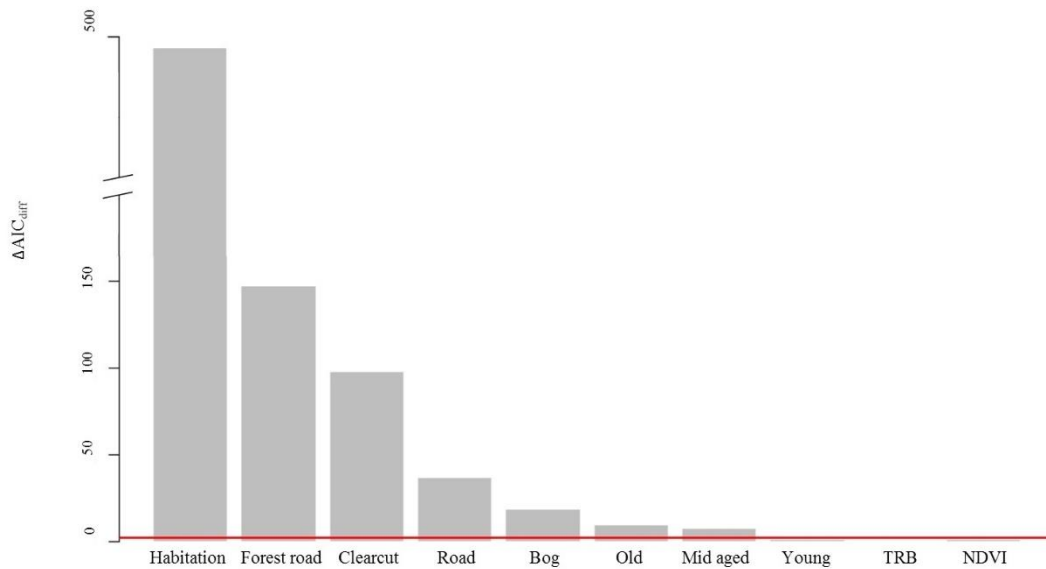

118



119 **References**

- 120 [1] Johnson, D.H. 1980 The comparison of usage and availability measurements for evaluating  
121 resource preference. *Ecology* **61**, 65-71.
- 122 [2] Manly, B., McDonald, L., Thomas, D.L., McDonald, T.L. & Erickson, W.P. 2002 *Resource*  
123 *selection by animals: statistical design and analysis for field studies*. Dordrecht, Kluwer  
124 Academic Publishers.
- 125 [3] Börger, L., Dalziel, B.D. & Fryxell, J.M. 2008 Are there general mechanisms of animal home  
126 range behaviour? A review and prospects for future research. *Ecology Letters* **11**, 637-650.  
127 (doi:10.1111/j.1461-0248.2008.01182.x).
- 128 [4] Edwards, M.A., Nagy, J.A. & Derocher, A.E. 2009 Low site fidelity and home range drift in  
129 a wide-ranging, large Arctic omnivore. *Animal Behaviour* **77**, 23-28.  
130 (doi:<http://dx.doi.org/10.1016/j.anbehav.2008.09.025>).
- 131 [5] Sorensen, A.A., Stenhouse, G.B., Bourbonnais, M.L. & Nelson, T.A. 2015 Effects of habitat  
132 quality and anthropogenic disturbance on grizzly bear (*Ursus arctos horribilis*) home-range  
133 fidelity. *Canadian Journal of Zoology* **93**, 857-865. (doi:10.1139/cjz-2015-0095).
- 134 [6] Zedrosser, A., Støen, O.-G., Sæbø, S. & Swenson, J.E. 2007 Should I stay or should I go?  
135 Natal dispersal in the brown bear. *Animal Behaviour* **74**, 369-376.  
136 (doi:<http://dx.doi.org/10.1016/j.anbehav.2006.09.015>).

137
